# Supplementary material for: Unveiling KLHL23 as a key immune regulator in hepatocellular carcinoma through integrated analysis
Source: publisher site journal article supplement (doi:10.18632/aging.206167), 2024-12-04
Supplement: Supplementary file [file aging-vnull-206167-supplementary-material-SD1.pdf]

## SUPPLEMENTARY FIGURES

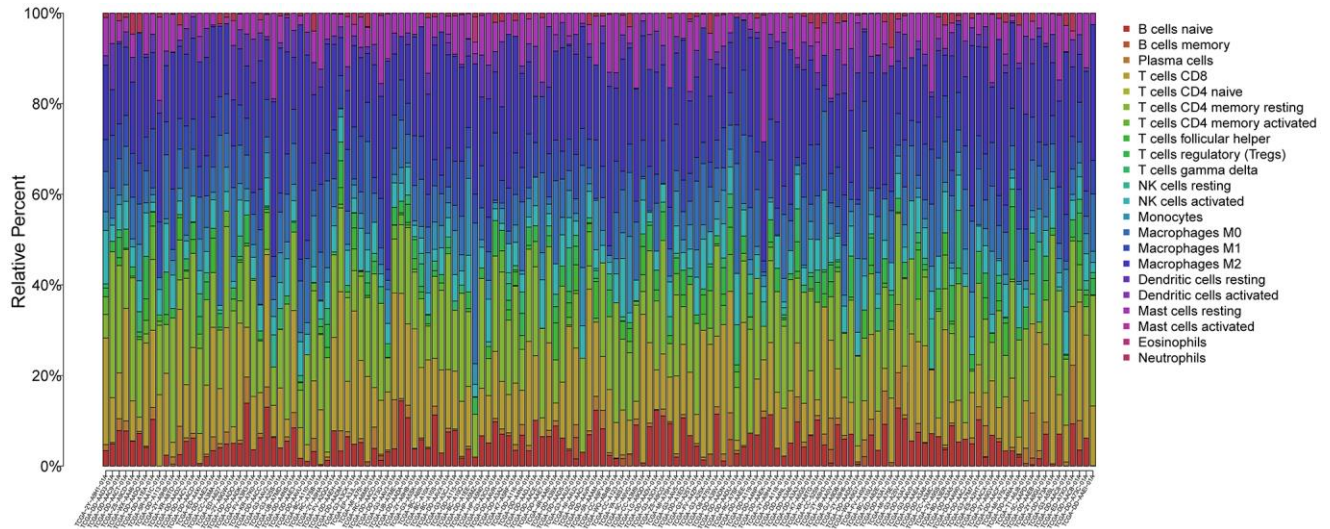

**Supplementary Figure 1. The role of KLHL23 in the tumor microenvironment of LIHC.** Immune cell distribution in KLHL23 lower expression LIHC patients.

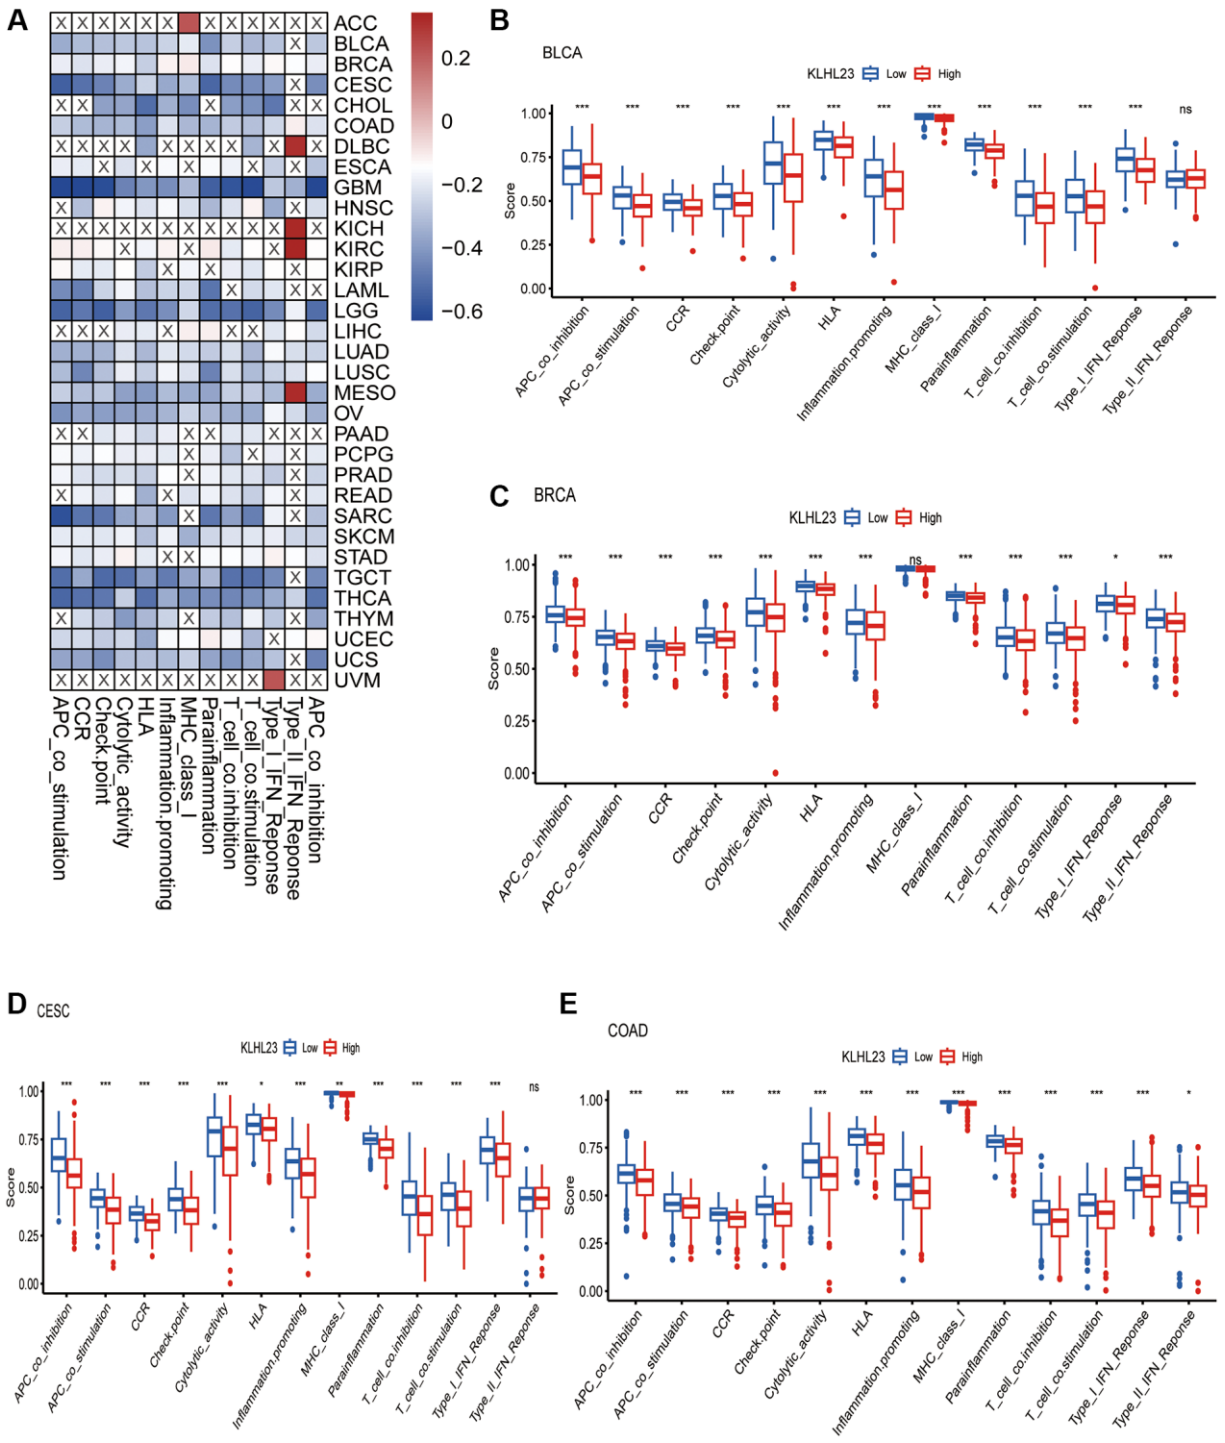



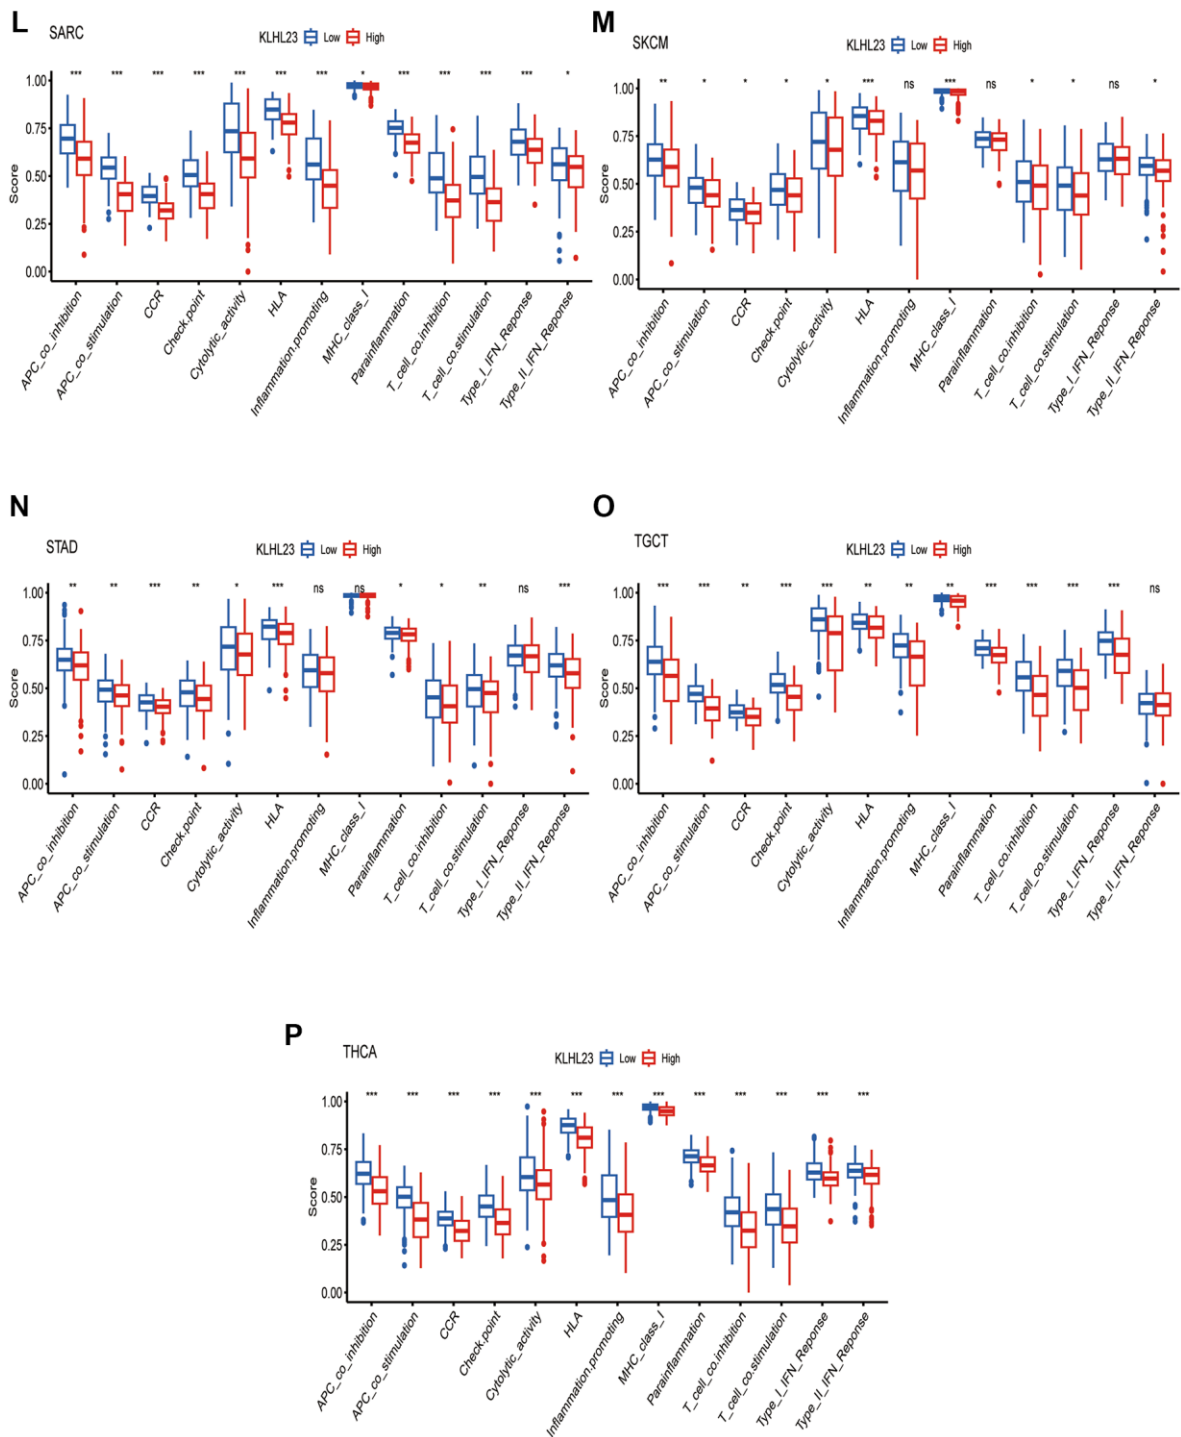

**Supplementary Figure 2. The effect of KLHL23 on immunological status across cancers.** (A) Association between KLHL23 and 13 tumor-associated immune cells, as calculated using the ssGSEA algorithm. (B–P) Differences in the various immune cell proportions between groups with high and low KLHL23 expression in representative cancers. (Abbreviation: ns: no significant difference. \* $P < 0.05$ ; \*\* $P < 0.01$ ; \*\*\* $P < 0.001$ ; \*\*\*\* $P < 0.0001$ ).



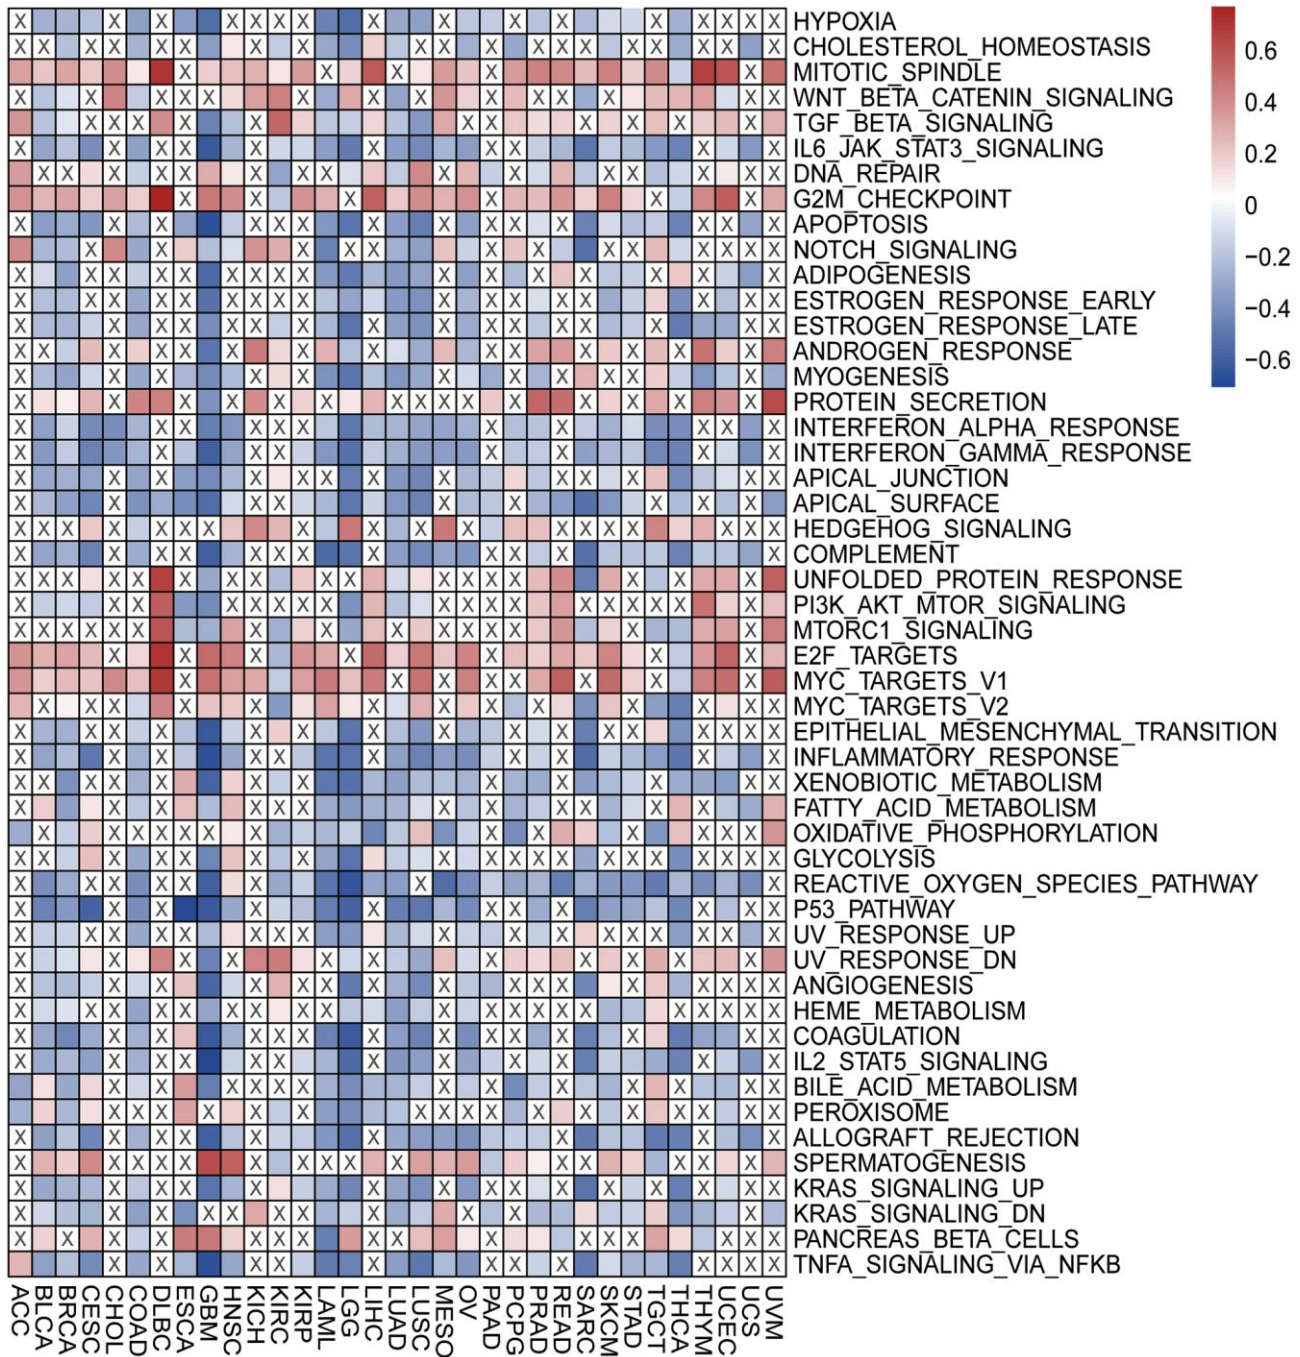

Supplementary Figure 3. KLHL23 signaling pathway analysis. Single cell analysis of KLHL23 expression in different cell types.
